# Supplementary material for: Genome-Wide Identification and Expression Analysis of the Sucrose Synthase Gene Family in Sweet Potato and Its Two Diploid Relatives
Source: MDPI journal article supplement (doi:10.3390/ijms241512493), 2023-08-06
Supplement: s1 [file s1]

**Table S1. Identification of SUSs in *I. batatas*, *I. trifida*, and *I. triloba*.**

|                   | <b>Gene<br/>Name</b> | <b>Gene ID</b>        | <b>Chr.</b> | <b>Gene Position</b> |
|-------------------|----------------------|-----------------------|-------------|----------------------|
| <i>I. batatas</i> | <i>IbSUS1</i>        | <i>g505.t1</i>        | LG1         | 2793890-2798579      |
|                   | <i>IbSUS2</i>        | <i>g5497.t1</i>       | LG2         | 8562714-8568830      |
|                   | <i>IbSUS3</i>        | <i>g29617.t1</i>      | LG7         | 31576704-31580891    |
|                   | <i>IbSUS4</i>        | <i>g30039.t1</i>      | LG7         | 34437879-34441970    |
|                   | <i>IbSUS5</i>        | <i>g31210.t1</i>      | LG8         | 5471709-5476663      |
|                   | <i>IbSUS6</i>        | <i>g55056.t1</i>      | LG13        | 27660772-27665566    |
|                   | <i>IbSUS7</i>        | <i>g55074.t1</i>      | LG13        | 27792067-27797658    |
|                   | <i>IbSUS8</i>        | <i>g55342.t1</i>      | LG13        | 29268770-29272895    |
|                   | <i>IbSUS9</i>        | <i>g60893.t1</i>      | LG15        | 6468996-6473927      |
| <i>I. trifida</i> | <i>ItfSUS1</i>       | <i>Itf05g23040.t1</i> | Chr05       | 23388562-23393210    |
|                   | <i>ItfSUS2</i>       | <i>Itf04g24160.t1</i> | Chr04       | 25686043-25692389    |
|                   | <i>ItfSUS3</i>       | <i>Itf03g05100.t1</i> | Chr03       | 3101581-3105775      |
|                   | <i>ItfSUS4</i>       | <i>Itf11g07860.t1</i> | Chr11       | 4351197-4356462      |
|                   | <i>ItfSUS5</i>       | <i>Itf02g04900.t1</i> | Chr02       | 6055942-6060284      |
|                   | <i>ItfSUS6</i>       | <i>Itf02g07130.t1</i> | Chr02       | 7203732-7209455      |
|                   | <i>ItfSUS7</i>       | <i>Itf06g18950.t1</i> | Chr06       | 21194480-21199532    |
| <i>I. triloba</i> | <i>ItbSUS1</i>       | <i>Itb05g23720.t1</i> | Chr05       | 28786401-28791478    |
|                   | <i>ItbSUS2</i>       | <i>Itb04g23580.t1</i> | Chr04       | 28590171-28596707    |
|                   | <i>ItbSUS3</i>       | <i>Itb03g05100.t1</i> | Chr03       | 3419915-3424462      |
|                   | <i>ItbSUS4</i>       | <i>Itb11g08290.t1</i> | Chr11       | 5423033-5428557      |
|                   | <i>ItbSUS5</i>       | <i>Itb02g00230.t1</i> | Chr02       | 198892-202920        |
|                   | <i>ItbSUS6</i>       | <i>Itb02g02420.t1</i> | Chr02       | 1386690-1392450      |
|                   | <i>ItbSUS7</i>       | <i>Itb06g17400.t1</i> | Chr06       | 21252081-21257133    |

**Table S2. Primers used in this study.**

| <b>Gene</b>   | <b>Forward Primer</b>            | <b>Reverse Primer</b>            |
|---------------|----------------------------------|----------------------------------|
| <i>actin</i>  | AGCAGCATGAAGATTAAGGTTGT<br>AGCAC | TGGAAAATTAGAAGCACTTCCTGT<br>GAAC |
| <i>IbSUS1</i> | AACAAAATGCGACCAGGAAC             | ACCAAATTCCTCATCGGTGTA            |
| <i>IbSUS2</i> | AGGTGTTTGGGAGTTTGTGC             | ACCCCATTTCCAATTGATGA             |
| <i>IbSUS3</i> | TCAATCTGGTTGTGGTTGGA             | GCGGTAGAGTTCGCTGTTTC             |
| <i>IbSUS4</i> | GTGGTTGGAGGTTCTTTGA              | GCGGTAGAGTTCGCTGTTTC             |
| <i>IbSUS5</i> | GAACAGGCTGCTGAGCTCTT             | CGCCATAACTTGCGGTATTT             |
| <i>IbSUS6</i> | AACTAGGTTGTTGCCGGATG             | GCAACATCCTCGGTGAAAGT             |
| <i>IbSUS7</i> | CCTGCCAATGGTAACTTCGT             | CGTCTTGCCCTTGTTATTGGT            |
| <i>IbSUS8</i> | TTCTTGCCAATTCACAGCAG             | TGCCTGAAACAACCTCTGCAC            |
| <i>IbSUS9</i> | GCCAACCCTTACCAAGTCAA             | GGACGTTTTGGAGTGTCGTT             |

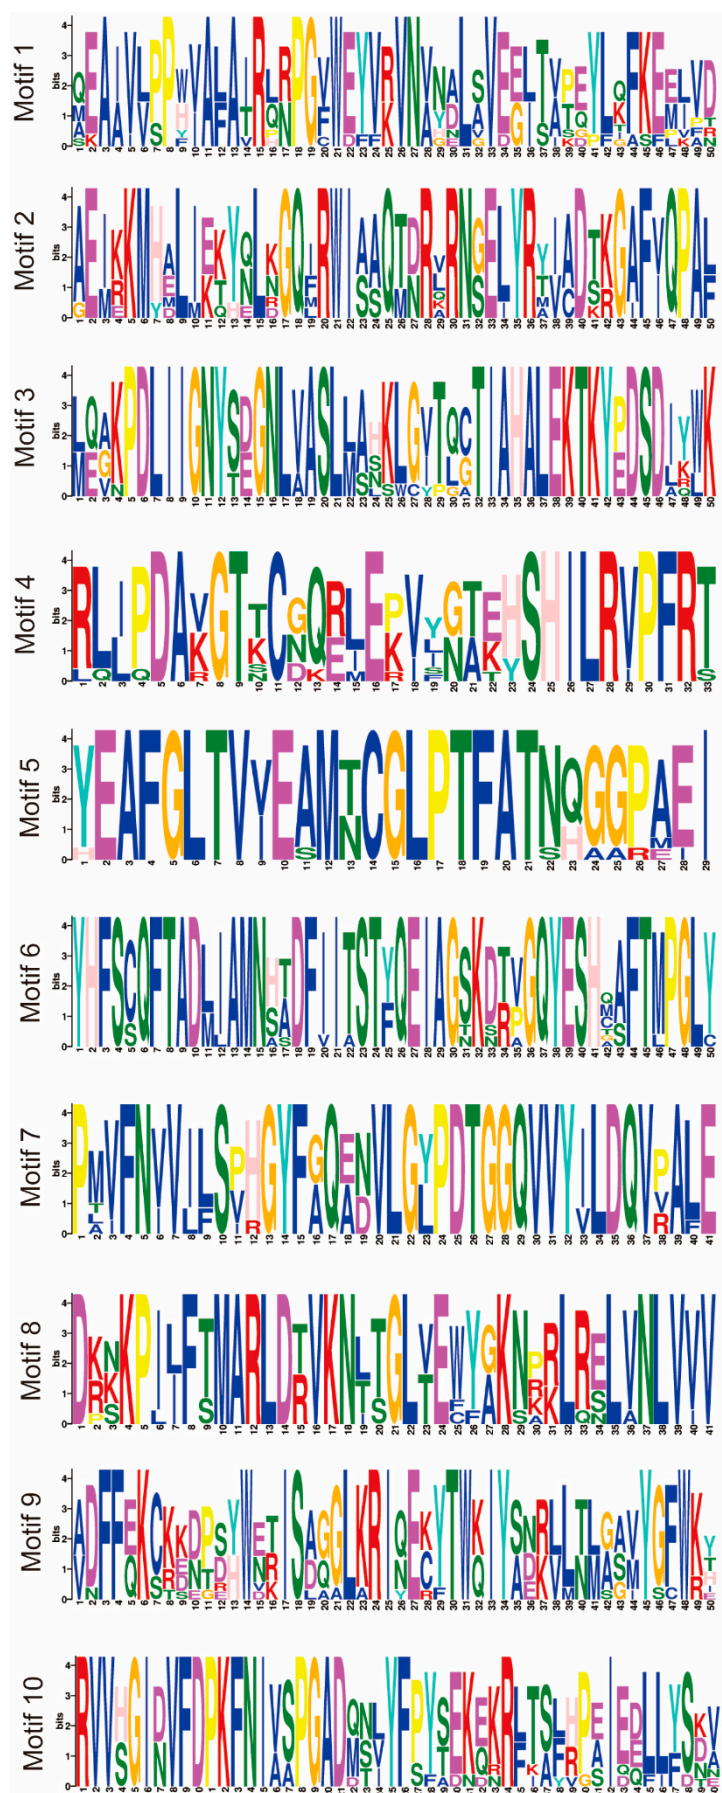

**Figure S1.** Sequence logos of the 10 conserved motifs.

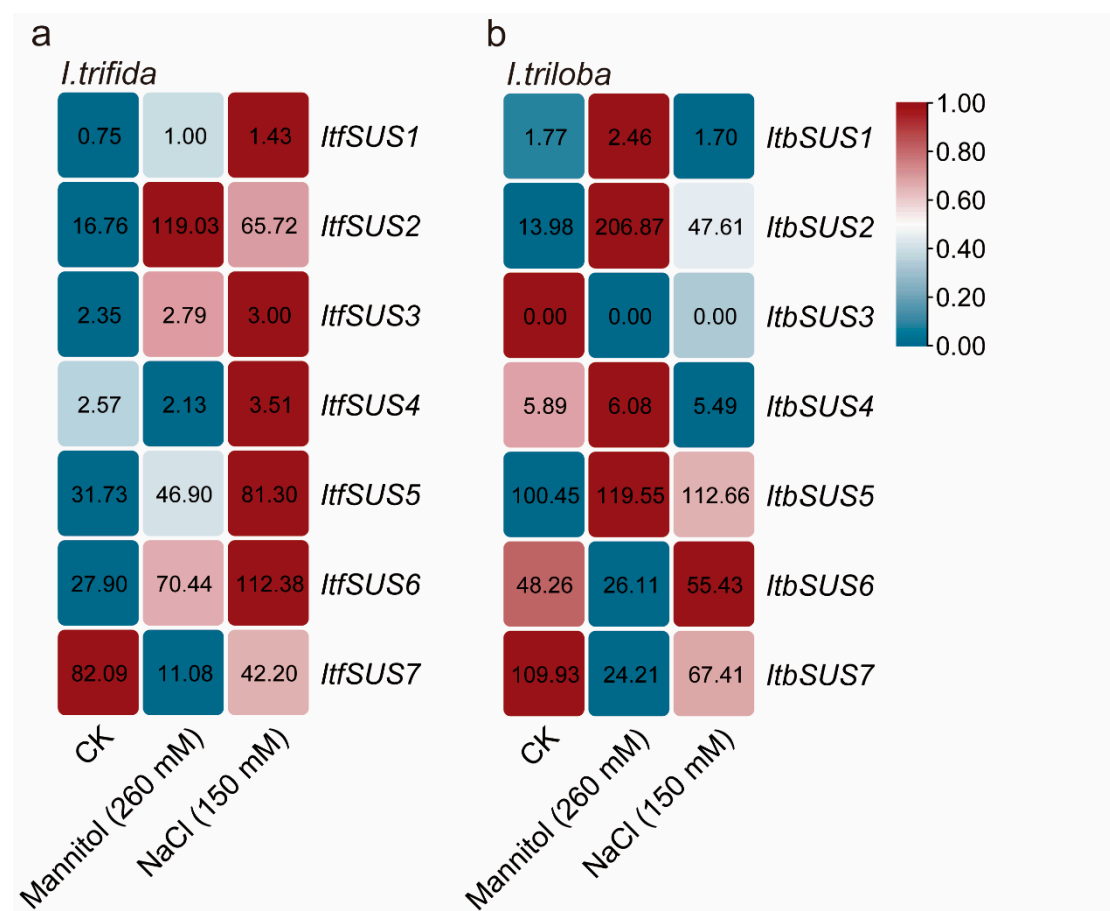

**Figure S2.** Expression analysis of *ItfSUS*s (a) and *ItbSUS*s (b) in response to drought and salt stresses as determined by RNA-seq. FPKM values are shown in the boxes.

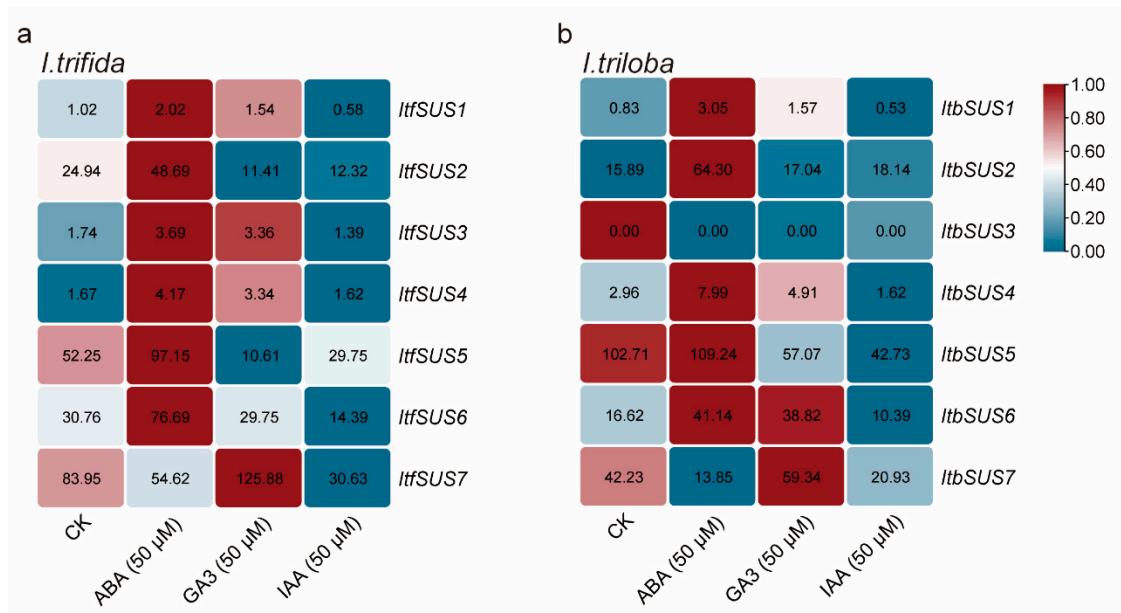

**Figure S3.** Expression analysis of *ItfSUSs* (**a**) and *ItbSUSs* (**b**) in response to different hormones (ABA, GA3, and IAA) as determined by RNA-seq. FPKM values are shown in the boxes.
